# Supplementary material for: Topical Alginate Protection against Pepsin-Mediated Esophageal Damage: E-Cadherin Proteolysis and Matrix Metalloproteinase Induction
Source: MDPI journal article supplement (doi:10.3390/ijms24097932), 2023-04-27

# SUPPLEMENTAL INFORMATION

## TABLES

Table S1. Expression of sE-cad responsive *MMPs*

|                       | Mean RQ±SD | p rel Control | p rel Pepsin pH4 | p rel Placebo + Pepsin pH4 | p rel SA-pB + Pepsin pH4 |
|-----------------------|------------|---------------|------------------|----------------------------|--------------------------|
| <i>MMP1</i>           |            |               |                  |                            |                          |
| Control               | 1.00±0.15  |               |                  |                            |                          |
| pH4                   | 0.98±0.04  | 0.90          | 0.0002           |                            |                          |
| Pepsin pH4            | 2.12±0.19  | 0.002         |                  |                            |                          |
| Placebo + Pepsin pH4  | 2.21±0.17  |               | 0.57             |                            |                          |
| SA-PB + Pepsin pH4    | 0.87±0.01  |               | 0.0035           | 0.0022                     |                          |
| SA-SB-CC + Pepsin pH4 | 0.88±0.08  |               | 0.0003           | 0.0002                     | 0.92                     |
| <i>MMP2</i>           |            |               |                  |                            |                          |
| Control               | 1.00±0.34  |               |                  |                            |                          |
| pH4                   | 1.33±0.17  | 0.19          | 0.007            |                            |                          |
| Pepsin pH4            | 3.79±1.27  | 0.0072        |                  |                            |                          |
| Placebo + Pepsin pH4  | 3.86±0.70  |               | 0.85             |                            |                          |
| SA-PB + Pepsin pH4    | 1.24±0.13  |               | 0.0053           | 0.0008                     |                          |
| SA-SB-CC + Pepsin pH4 | 1.14±0.11  |               | 0.0038           | 0.0005                     | 0.37                     |
| <i>MMP9</i>           |            |               |                  |                            |                          |
| Control               | 1.00±0.10  |               |                  |                            |                          |
| pH4                   | 1.34±0.08  | 0.013         | 0.0002           |                            |                          |
| Pepsin pH4            | 8.02±1.69  | 0.0001        |                  |                            |                          |
| Placebo + Pepsin pH4  | 8.77±2.30  |               | 0.73             |                            |                          |
| SA-PB + Pepsin pH4    | 0.78±0.12  |               | 0.0001           | 0.0002                     |                          |
| SA-SB-CC + Pepsin pH4 | 0.64±0.12  |               | 0.0001           | 0.0002                     | 0.25                     |
| <i>MMP14</i>          |            |               |                  |                            |                          |
| Control               | 1.00±0.09  |               |                  |                            |                          |
| pH4                   | 1.33±0.07  | 0.0095        | 0.013            |                            |                          |
| Pepsin pH4            | 1.65±0.12  | 0.0018        |                  |                            |                          |
| Placebo + Pepsin pH4  | 1.54±0.05  |               | 0.25             |                            |                          |
| SA-PB + Pepsin pH4    | 1.00±0.10  |               | 0.0026           | 0.0025                     |                          |
| SA-SB-CC + Pepsin pH4 | 1.11±0.05  |               | 0.0016           | 0.0008                     | 0.17                     |

RQ=relative quantity

Figure S1. Dilution of alginate (1:10) remedied loss of cell viability caused by undilute alginate. BAR-T cells were exposed to HBSS, placebo, or alginate or dilute placebo/alginate briefly before two washes in HBSS and 30 minute incubation in HBSS at 37°C/5% CO<sub>2</sub> prior to ATP cell viability assay. RLU=relative luminescent units; error bars=SEM

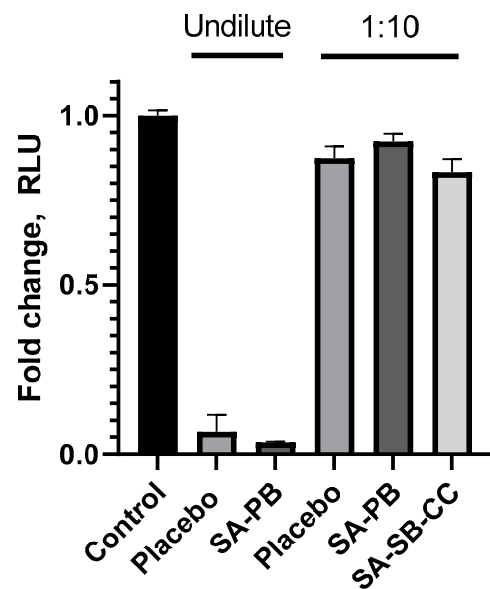

Figure S2. Pepsin-acid treatment (1mg/ml pepsin pH4) 10-30min yielded less drastic loss of cell viability relative to 1 hour treatment and was therefore used in experiments to assess gene/protein expression. RLU=relative luminescent units; error bars=SEM

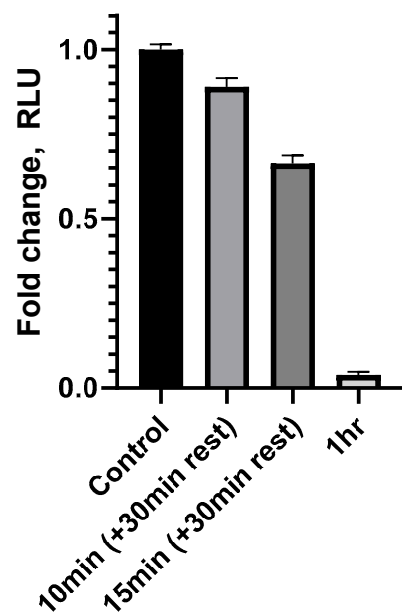

Figure S3. E-cadherin cleavage was partial after 10 minutes with 1mg/ml pepsin pH4 and total after 30 minutes.

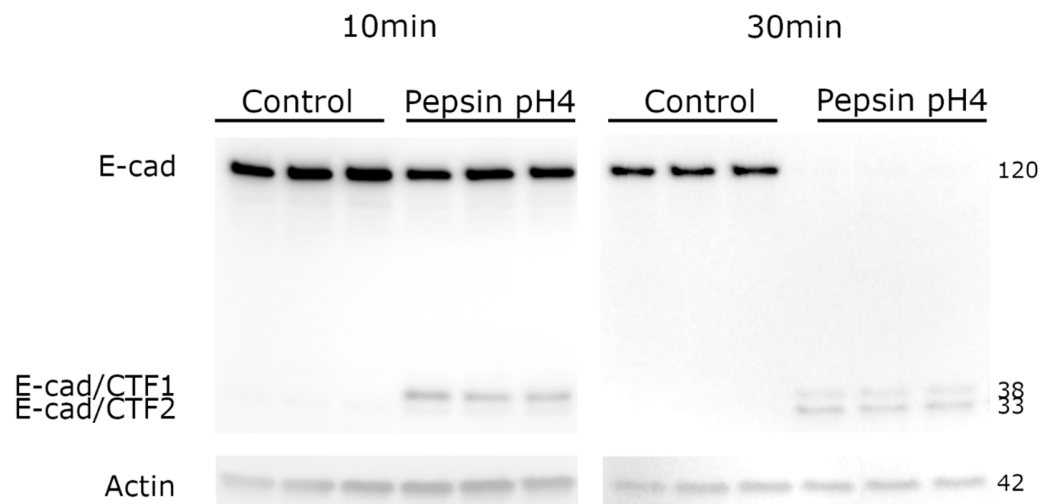

## Statistical Analyses Results

### *I.ATP assay: Cell viability (Figure 1)*

| Group                 | N Obs | Mean        | Std Dev    | Minimum     | Lower Quartile | Median      | Upper Quartile | Maximum     |
|-----------------------|-------|-------------|------------|-------------|----------------|-------------|----------------|-------------|
| Control               | 8     | 13290688.88 | 837162.54  | 11786739.00 | 12963682.50    | 13219295.50 | 13814795.50    | 14543225.00 |
| SA-PB + Pepsin pH4    | 8     | 11379992.50 | 2140689.07 | 7189483.00  | 9992467.50     | 12346628.00 | 12947696.50    | 13276873.00 |
| SA-SB-CC + Pepsin pH4 | 8     | 10657598.25 | 1839555.77 | 8780505.00  | 9060248.50     | 10165562.00 | 12340782.50    | 13347095.00 |
| Pepsin pH4            | 7     | 404226.00   | 129900.65  | 296963.00   | 329360.00      | 361200.00   | 402957.00      | 686131.00   |
| Placebo + Pepsin pH4  | 8     | 432084.13   | 376680.81  | 101289.00   | 133052.50      | 272579.00   | 699427.50      | 1145266.00  |

| Comparison                                 | P-value |
|--------------------------------------------|---------|
| Control vs. Pepsin pH4                     | <0.0001 |
| Control vs. Placebo+Pepsin pH4             | <0.0001 |
| Control vs. SA-PB+Pepsin pH4               | 0.043   |
| Control vs. SA-SB-CC+Pepsin pH4            | 0.0024  |
| Pepsin pH4 vs. Placebo+Pepsin pH4          | 0.85    |
| Pepsin pH4 vs. SA-PB+Pepsin pH4            | <0.0001 |
| Pepsin pH4 vs. SA-SB-CC+Pepsin pH4         | <0.0001 |
| Placebo+Pepsin pH4 vs. SA-PB+Pepsin pH4    | <0.0001 |
| Placebo+Pepsin pH4 vs. SA-SB-CC+Pepsin pH4 | <0.0001 |
| SA-PB+Pepsin pH4 vs. SA-SB-CC+Pepsin pH4   | 0.48    |

## ***II.ATP assay: Proliferation (Figure 6)***

| Group      | N Obs | Mean        | Std Dev    | Minimum     | Lower Quartile | Median      | Upper Quartile | Maximum     |
|------------|-------|-------------|------------|-------------|----------------|-------------|----------------|-------------|
| Acid       | 24    | 9657921.58  | 326544.85  | 9202465.00  | 9461319.50     | 9574875.50  | 9836059.00     | 10584557.00 |
| Control    | 24    | 11808629.38 | 1688947.98 | 9120330.00  | 9645761.00     | 12625646.00 | 13000304.50    | 14233158.00 |
| Pepsin pH4 | 22    | 16653334.68 | 1874353.27 | 14682413.00 | 15205047.00    | 15949018.50 | 19099147.00    | 19735751.00 |

| Comparison             | P-value |
|------------------------|---------|
| Control vs. Acid       | <0.0001 |
| Control vs. Pepsin pH4 | <0.0001 |
| Acid vs. Pepsin pH4    | <0.0001 |

# Figure 3 Replicate images

Scale bars = 50µm

Blue: DAPI

Green: E-cadherin

## Control

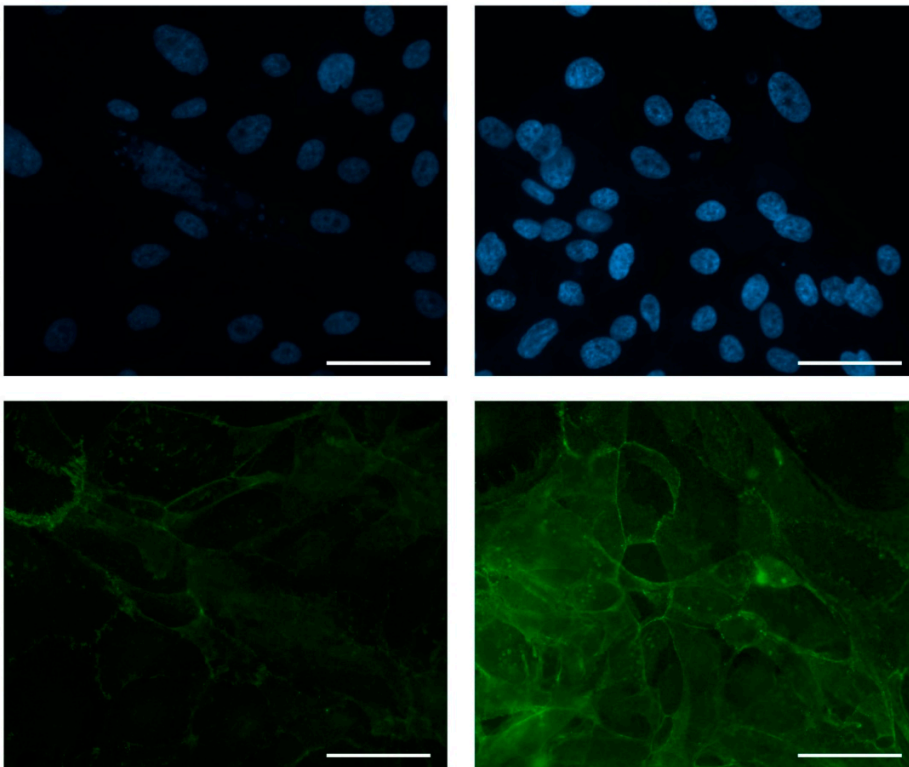

pH4

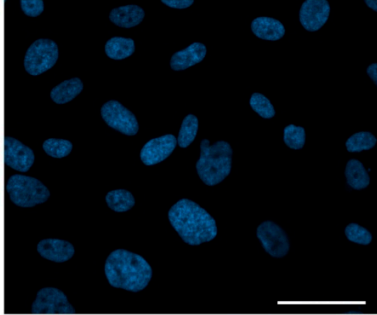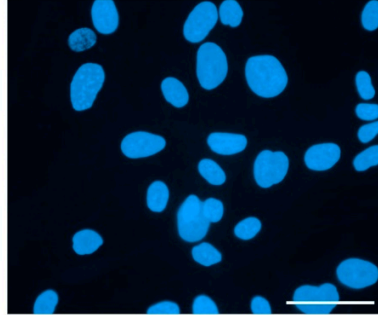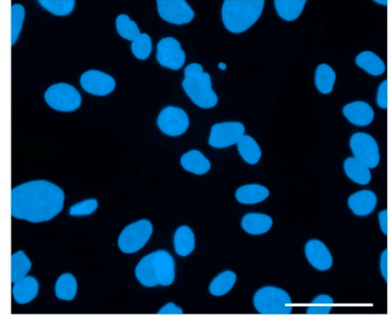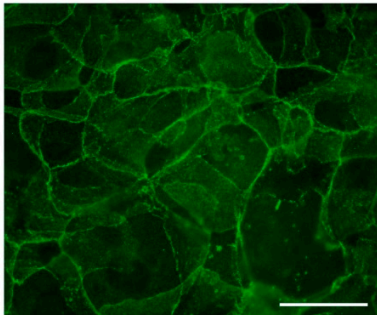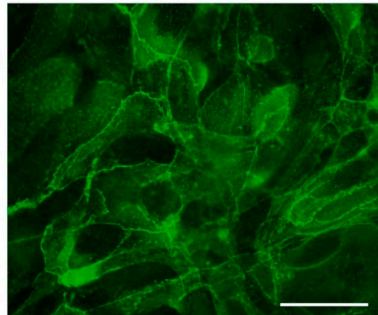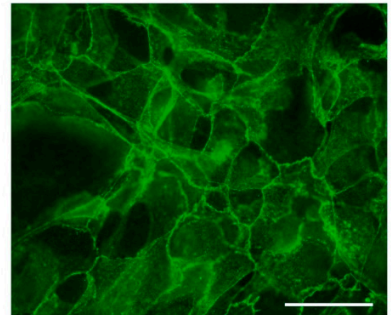



# Pepsin pH4

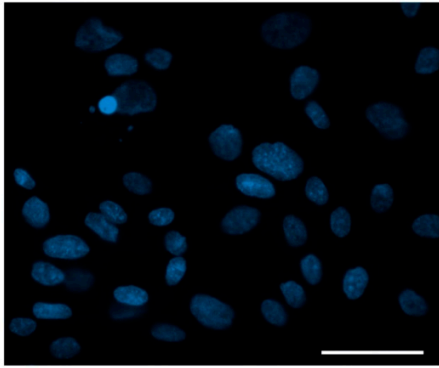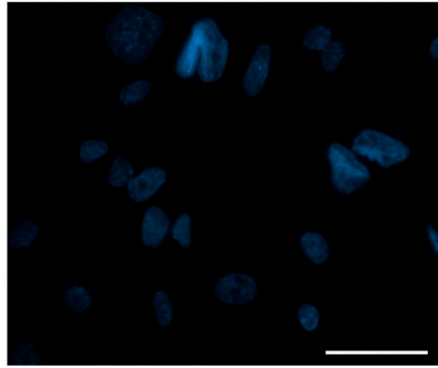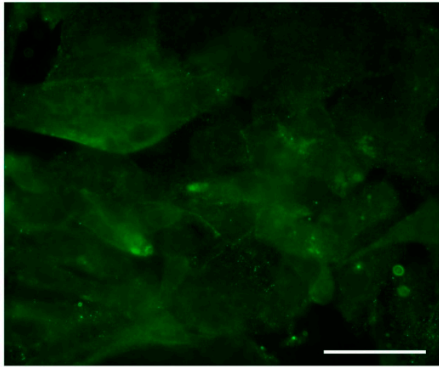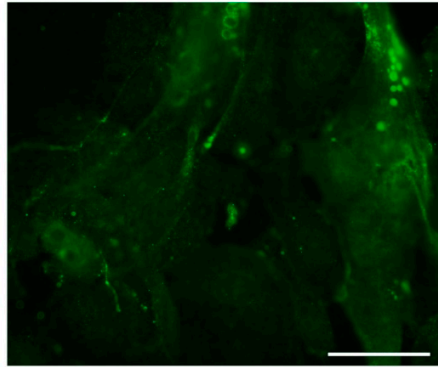

## Placebo + Pepsin pH4

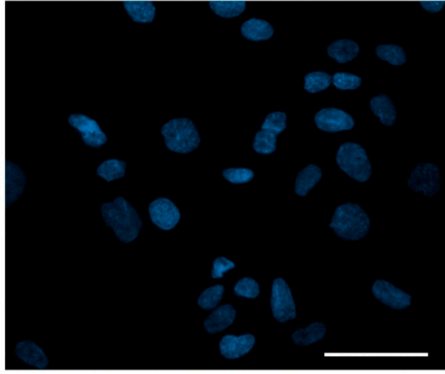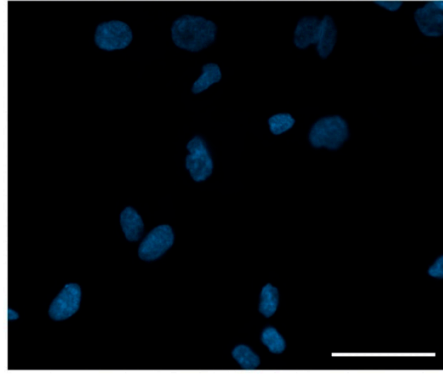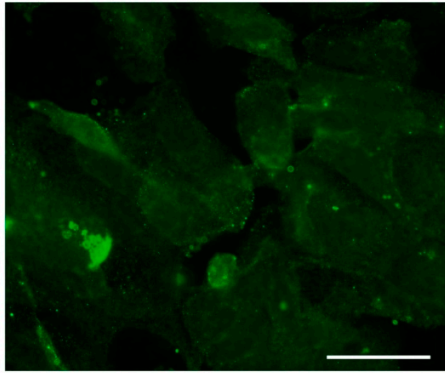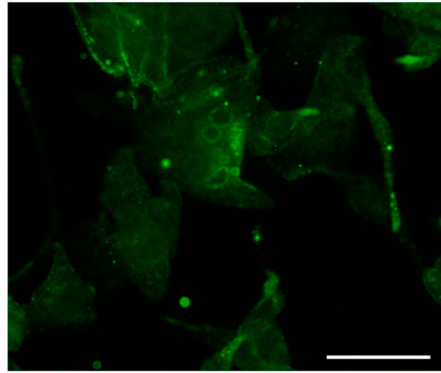

# SA-PB + Pepsin pH4

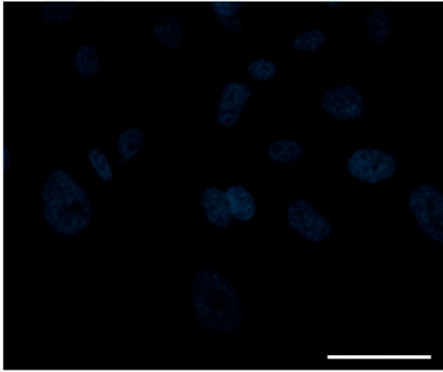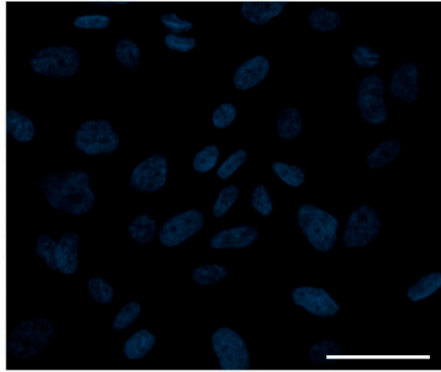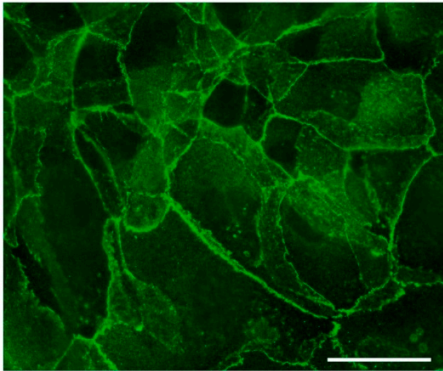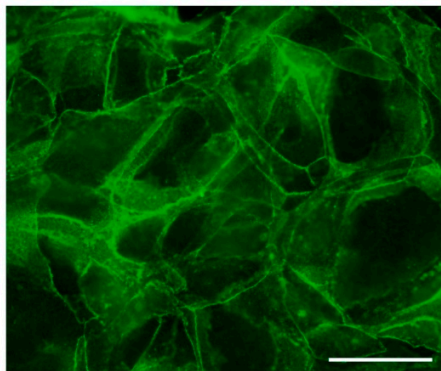

# SA-SB-CC + Pepsin pH4

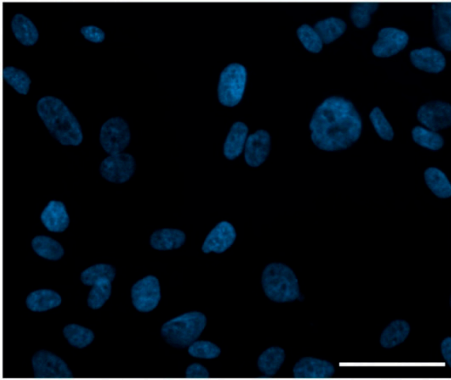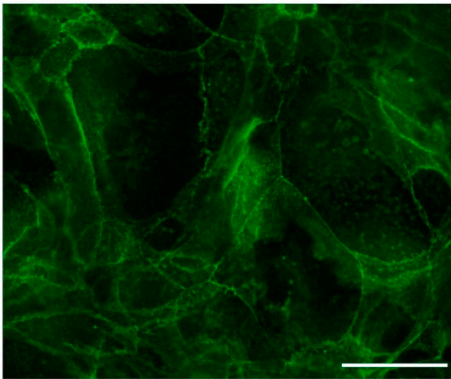

IgG

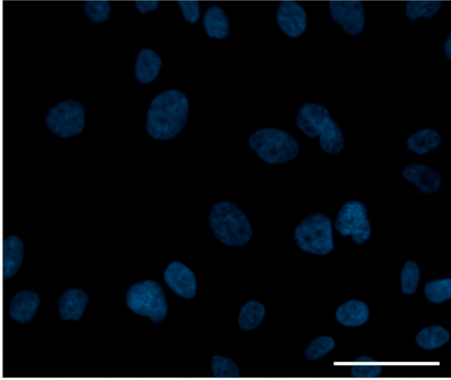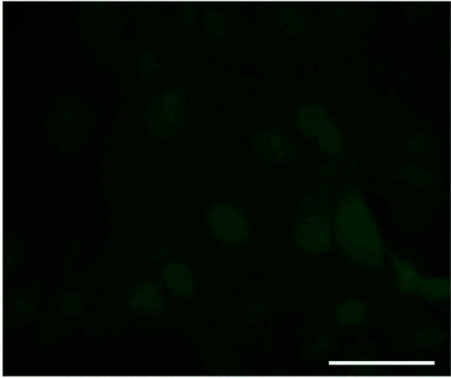

Supplement: s1 [file s1]
